# Supplementary material for: COVID-19 Pandemic Impacts Food Security and Causes Psychosocial Stress in Nigeria
Source: Preprints.org preprint supplement (doi:10.20944/preprints202301.0244.v1), 2023-01-13
Supplement: Supplementary file 1 [file supplementary]

## Supplementary Materials

S1 Table. Economic and livelihood data and food-related issues for respondents psychosocial and food security-related impacts of COVID-19, Nigeria.

| Variable                                                                   | Category (n) | Mean $\pm$ SD (Naira)       | Minimum (Naira)   | Maximum (Naira)                                                                                                                                                         | CI <sub>95%</sub> (Naira) |
|----------------------------------------------------------------------------|--------------|-----------------------------|-------------------|-------------------------------------------------------------------------------------------------------------------------------------------------------------------------|---------------------------|
| Income level                                                               | Low (287)    | 55,010.45 $\pm$ 25,718.55   | 5,000             | 100,000                                                                                                                                                                 | 52,022.35 – 57,998.55     |
|                                                                            | Medium (82)  | 196,280.49 $\pm$ 86,919.04  | 110,000           | 400,000                                                                                                                                                                 | 177,182.28 – 215,378.70   |
|                                                                            | High (16)    | 740,375.00 $\pm$ 274,546.14 | 500,000           | 1,600,000                                                                                                                                                               | 594,079.62 – 886,670.38   |
| Family monthly transport cost                                              | Low (287)    | 10,579.37 $\pm$ 7,643.57    | 500               | 50,000                                                                                                                                                                  | 9,689.74 – 11,469.00      |
|                                                                            | Medium (82)  | 30,262.20 $\pm$ 18,291.40   | 2000              | 100,000                                                                                                                                                                 | 26,243.13 – 34,281.26     |
|                                                                            | High (16)    | 73,375.00 $\pm$ 51,401.52   | 20,000            | 200,000                                                                                                                                                                 | 45,985.05 – 100,764.95    |
| Other non-monetary parameters                                              |              | Number (%)                  | CI <sub>95%</sub> | Comments                                                                                                                                                                |                           |
| Other income sources (406)                                                 | Yes          | 125 (30.79)                 | 26.50 – 35.44     |                                                                                                                                                                         |                           |
|                                                                            | No           | 281 (69.21)                 | 64.56 – 73.50     |                                                                                                                                                                         |                           |
| Belong to cooperatives (406)                                               | Yes          | 64 (15.76)                  | 12.54 – 19.63     | Other sources of financial assistance were from churches, friends, and relatives, and outside cooperative groups.                                                       |                           |
|                                                                            | No           | 342 (84.24)                 | 80.37 – 87.46     |                                                                                                                                                                         |                           |
| Have food items that can last for 14 days during the COVID-19 period (407) | Yes          | 230 (56.51)                 | 51.66 – 61.24     |                                                                                                                                                                         |                           |
|                                                                            | No           | 177 (43.49)                 | 38.76 – 48.34     |                                                                                                                                                                         |                           |
| Ran out of food during the COVID-19 pandemic (409)                         | Yes          | 173 (42.30)                 | 37.60 – 47.14     | 150 of the 173 (86.71%) households have ran out of food more than one times during the COVID-19 pandemic                                                                |                           |
|                                                                            | No           | 236 (57.70)                 | 52.86 – 62.40     |                                                                                                                                                                         |                           |
| Received some assistance from the government (407)                         | Yes          | 19 (4.67)                   | 3.01 – 7.18       | The assistance were in forms of food palliatives, relief packs, financial assistance, and Nigeria Incentive-based Risk Sharing System for Agricultural Lending (NIRSAL) |                           |
|                                                                            | No           | 388 (95.33)                 | 92.82 – 96.99     |                                                                                                                                                                         |                           |

Family monthly transport cost is 19.23% (18.90 – 19.56) of total incomes for low-income earners, 15.42% (15.26 – 15.58) for middle-income and 9.91% (9.84 – 9.98) for the high-income earners. Family monthly feeding cost is 39.89% (37.62 – 42.16) of total incomes for low-income earners, 37.06% (33.42 – 40.69) for middle-income and 37.44% (27.69 – 47.19) for the high-income earners. As of the time of conducting the survey (26 February 2021), 1 US\$ = 380.58 Naira. It should be noted that the figures presented here are based on the responses from respondents during the study and may not be representative of the whole population of Nigeria.

S2 Table. Psychological stress and self-rated quality of life of respondents per socioeconomic earning category due to impact of COVID-19

| Variable (n)                                                                   | Income category | Not at all (%) | Only a little (%) | Somewhat much (%) | A great deal (%) |
|--------------------------------------------------------------------------------|-----------------|----------------|-------------------|-------------------|------------------|
| It takes a long time to fall asleep                                            | Low (294)       | 159 (54.08)    | 77 (26.19)        | 47 (15.99)        | 11 (3.74)        |
|                                                                                | Medium (96)     | 62 (64.58)     | 21 (21.88)        | 9 (9.38)          | 4 (4.17)         |
|                                                                                | High (19)       | 12 (63.16)     | 4 (21.05)         | 3 (15.79)         | 0 (0.00)         |
| Restless sleep                                                                 | Low (294)       | 152 (51.70)    | 77 (26.19)        | 53 (18.03)        | 12 (4.08)        |
|                                                                                | Medium (96)     | 64 (66.67)     | 26 (27.08)        | 3 (3.13)          | 3 (3.13)         |
|                                                                                | High (19)       | 16 (84.21)     | 2 (10.53)         | 0 (0.00)          | 1 (5.26)         |
| Waking too early and not being able to fall asleep again                       | Low (294)       | 146 (49.66)    | 83 (28.23)        | 42 (14.29)        | 23 (7.82)        |
|                                                                                | Medium (96)     | 54 (56.25)     | 27 (28.13)        | 7 (7.29)          | 8 (8.33)         |
|                                                                                | High (19)       | 15 (78.95)     | 1 (5.26)          | 1 (5.26)          | 2 (10.53)        |
| Feeling tired on waking up                                                     | Low (294)       | 168 (57.14)    | 81 (27.55)        | 33 (11.22)        | 12 (4.08)        |
|                                                                                | Medium (96)     | 45 (46.88)     | 40 (41.67)        | 8 (8.33)          | 3 (3.13)         |
|                                                                                | High (19)       | 16 (84.21)     | 0 (0.00)          | 2 (10.53)         | 1 (5.26)         |
| Chest, stomach or abdominal pain                                               | Low (294)       | 220 (74.83)    | 54 (18.37)        | 17 (5.78)         | 3 (1.02)         |
|                                                                                | Medium (96)     | 81 (84.38)     | 11 (11.46)        | 3 (3.13)          | 1 (1.04)         |
|                                                                                | High (19)       | 18 (94.74)     | 1 (5.26)          | 0 (0.00)          | 0 (0.00)         |
| Heart beating quickly or strongly (palpitation) without a reason like exercise | Low (294)       | 243 (82.65)    | 36 (12.24)        | 13 (4.42)         | 2 (0.68)         |
|                                                                                | Medium (96)     | 78 (81.25)     | 10 (10.42)        | 5 (5.21)          | 3 (3.13)         |
|                                                                                | High (19)       | 15 (78.95)     | 3 (15.79)         | 0 (0.00)          | 1 (5.26)         |
| Feeling dizzy or like fainting                                                 | Low (293)       | 240 (81.91)    | 36 (12.29)        | 16 (5.46)         | 1 (0.34)         |
|                                                                                | Medium (95)     | 86 (90.53)     | 6 (6.32)          | 2 (2.11)          | 1 (1.05)         |
|                                                                                | High (19)       | 15 (78.95)     | 2 (10.53)         | 2 (10.53)         | 0 (0.00)         |
| Feeling pressure or tightness in the head or body                              | Low (292)       | 215 (73.63)    | 61 (20.89)        | 13 (4.45)         | 3 (1.03)         |
|                                                                                | Medium (96)     | 75 (78.13)     | 16 (16.67)        | 4 (4.17)          | 1 (1.04)         |
|                                                                                | High (19)       | 16 (84.21)     | 1 (5.26)          | 0 (0.00)          | 2 (10.53)        |
| Breathing difficulties or feeling of not having enough air                     | Low (292)       | 243 (83.22)    | 29 (9.93)         | 17 (5.82)         | 3 (1.03)         |
|                                                                                | Medium (96)     | 83 (86.65)     | 8 (8.33)          | 5 (5.21)          | 0 (0.00)         |
|                                                                                | High (19)       | 16 (84.21)     | 2 (10.53)         | 0 (0.00)          | 1 (5.26)         |
| Feeling tired or lack of energy                                                | Low (294)       | 190 (64.63)    | 55 (18.71)        | 28 (9.52)         | 21 (7.14)        |
|                                                                                | Medium (96)     | 61 (63.54)     | 26 (27.08)        | 7 (7.29)          | 2 (2.08)         |
|                                                                                | High (19)       | 16 (84.21)     | 2 (10.53)         | 1 (5.26)          | 0 (0.00)         |
| Irritable                                                                      | Low (294)       | 192 (65.31)    | 73 (24.83)        | 24 (8.16)         | 5 (1.70)         |
|                                                                                | Medium (96)     | 73 (76.04)     | 16 (16.67)        | 7 (7.29)          | 0 (0.00)         |
|                                                                                | High (19)       | 14 (73.70)     | 4 (21.05)         | 0 (0.00)          | 1 (5.26)         |
| Sad or depressed                                                               | Low (293)       | 175 (59.73)    | 87 (29.69)        | 21 (7.17)         | 10 (3.41)        |
|                                                                                | Medium (96)     | 65 (67.71)     | 23 (23.96)        | 5 (5.21)          | 3 (3.13)         |
|                                                                                | High (19)       | 14 (73.70)     | 3 (15.79)         | 2 (10.52)         | 0 (0.00)         |
| Feeling tensed or 'wound up'                                                   | Low (293)       | 188 (63.95)    | 56 (19.05)        | 41 (13.95)        | 8 (13.95)        |
|                                                                                | Medium (97)     | 67 (69.07)     | 21 (21.65)        | 7 (7.22)          | 2 (2.06)         |
|                                                                                | High (19)       | 16 (84.21)     | 2 (10.52)         | 0 (0.00)          | 1 (5.26)         |
| Lost interest in most things                                                   | Low (293)       | 201 (68.60)    | 60 (20.48)        | 22 (7.51)         | 10 (3.41)        |
|                                                                                | Medium (97)     | 67 (69.07)     | 21 (21.65)        | 6 (6.19)          | 3 (3.09)         |
|                                                                                | High (19)       | 16 (84.21)     | 2 (10.52)         | 1 (5.26)          | 0 (0.00)         |
| Attack or panic                                                                | Low (294)       | 232 (78.91)    | 38 (12.92)        | 22 (7.48)         | 2 (0.68)         |
|                                                                                | Medium (97)     | 85 (87.63)     | 8 (8.25)          | 4 (4.12)          | 0 (0.00)         |
|                                                                                | High (19)       | 18 (94.73)     | 1 (5.26)          | 0 (0.00)          | 0 (0.00)         |
| Perception of having a physical COVID-19 related problem wrongly diagnosed     | Low (293)       | 256 (87.37)    | 27 (9.21)         | 9 (3.07)          | 1 (0.34)         |
|                                                                                | Medium (97)     | 88 (90.72)     | 7 (7.22)          | 2 (2.06)          | 0 (0.00)         |
|                                                                                | High (19)       | 19 (100.00)    | 0 (0.00)          | 0 (0.00)          | 0 (0.00)         |
| After reading or hearing about COVID-19, feeling of having similar symptoms    | Low (293)       | 251 (85.67)    | 22 (7.50)         | 19 (6.48)         | 1 (0.34)         |
|                                                                                | Medium (97)     | 83 (85.57)     | 10 (10.31)        | 2 (2.06)          | 2 (2.06)         |
|                                                                                | High (19)       | 18 (94.73)     | 1 (5.26)          | 0 (0.00)          | 0 (0.00)         |

|                                                                                                                                   |             |             |            |           |          |
|-----------------------------------------------------------------------------------------------------------------------------------|-------------|-------------|------------|-----------|----------|
| When I noticed a sensation in your nose, nostrils, trachea or chest, or I coughed, I find it difficult to think of something else | Low (293)   | 240 (81.91) | 31(10.58)  | 13 (4.44) | 9 (3.07) |
|                                                                                                                                   | Medium (97) | 75 (77.32)  | 13 (13.40) | 4 (4.12)  | 5 (5.15) |
|                                                                                                                                   | High (19)   | 15 (78.95)  | 2 (10.52)  | 1 (5.26)  | 1 (5.26) |

*Of the total 403 respondents, following the advent of COVID-19, a total of 4 (1.0 %) felt awful/terrible, 41 (10.2 %) felt poor, 152 (37.7 %) felt fair, 145 (36.0 %) felt good and 61 (15.1 %) reported to be with excellent feelings.*
